# Supplementary material for: Human islet T cells are highly reactive to preproinsulin in type 1 diabetes
Source: PubMed Central journal article supplement — Proc Natl Acad Sci U S A. 2021 Oct 5;118(41):e2107208118. doi: 10.1073/pnas.2107208118 (PMC8521679; doi:10.1073/pnas.2107208118), 2021-10-05
Supplement: pnas.2107208118.sapp.pdf [file pnas.2107208118.sapp.pdf]

# Supplementary Figure 1

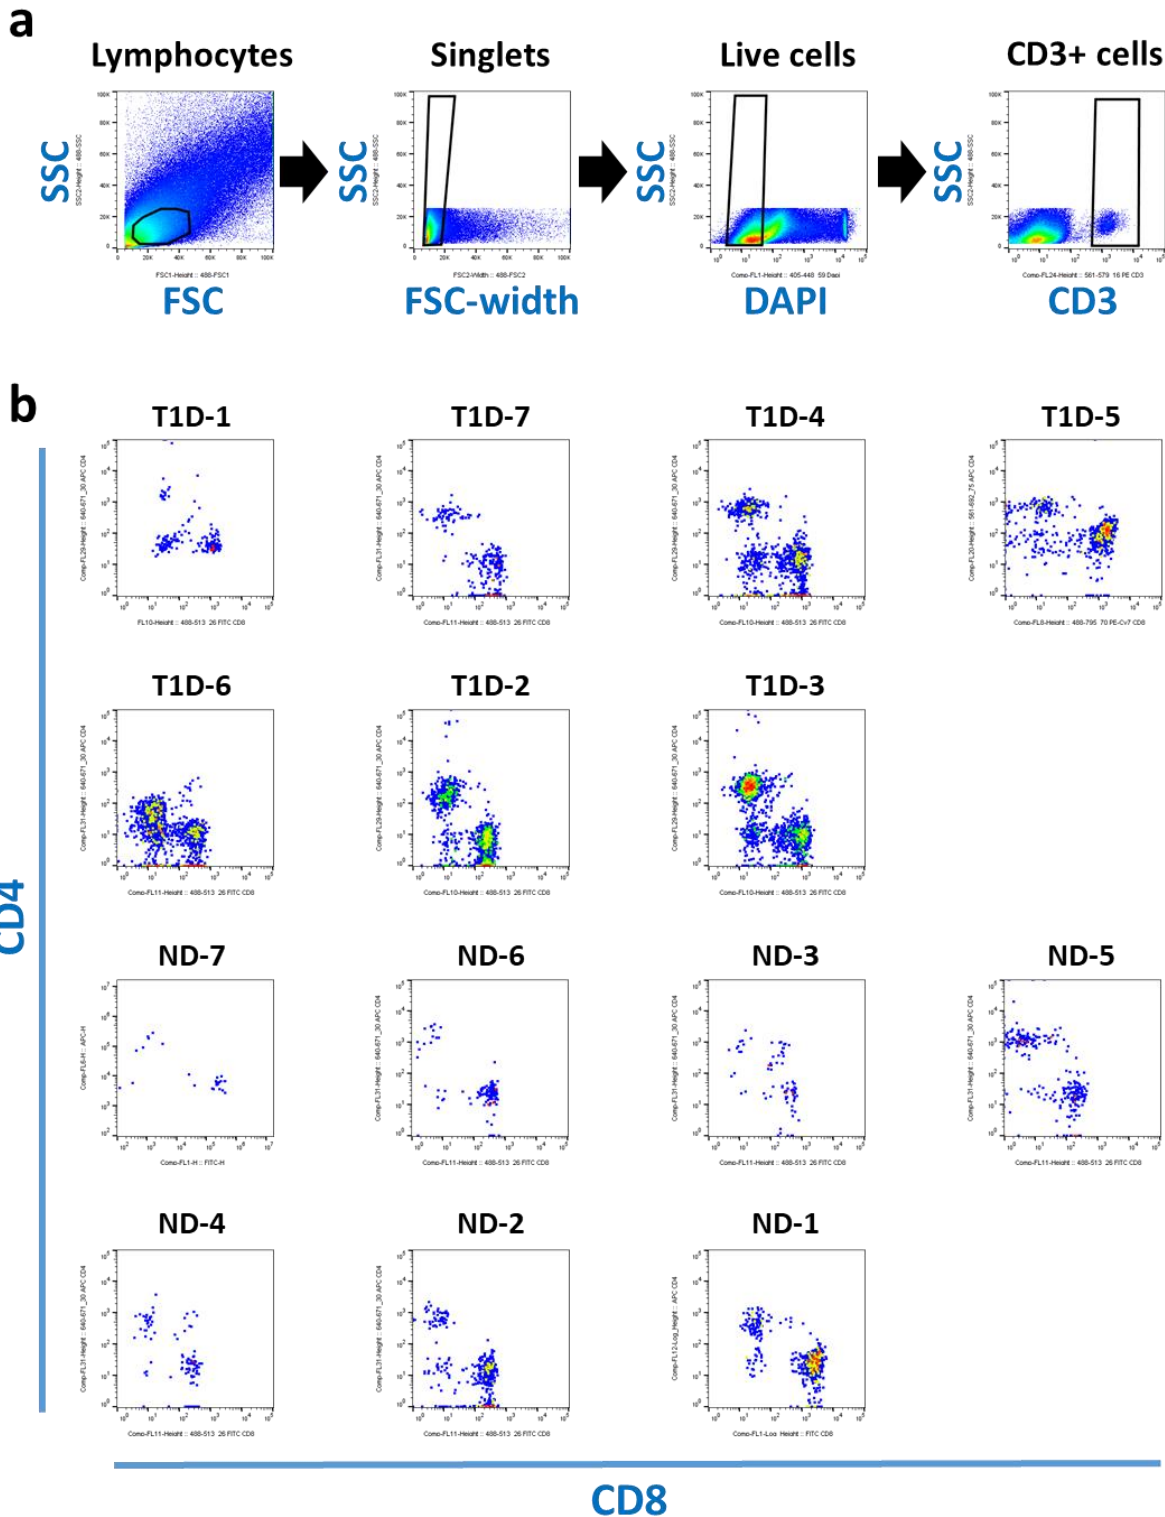

**Supplementary Figure 1: Flow cytometry sorting of CD4 and CD8 T-cells.** (a) Islet tissues were dispersed into single cells, followed by staining with anti-CD3, anti-CD4, and anti-CD8 antibodies and DAPI. Single lymphocytes were determined in the forward and side scatter view, living cells were selected by DAPI-negative cells, and CD3<sup>+</sup> cells were identified to find CD3<sup>+</sup>CD4<sup>+</sup> and CD3<sup>+</sup>CD8<sup>+</sup> cells. (b) Individual panels show CD3<sup>+</sup> cells determined by the gating strategy indicated in (a). Cells were stained with anti-CD4 and anti-CD8 antibodies.

## Supplementary Figure 2

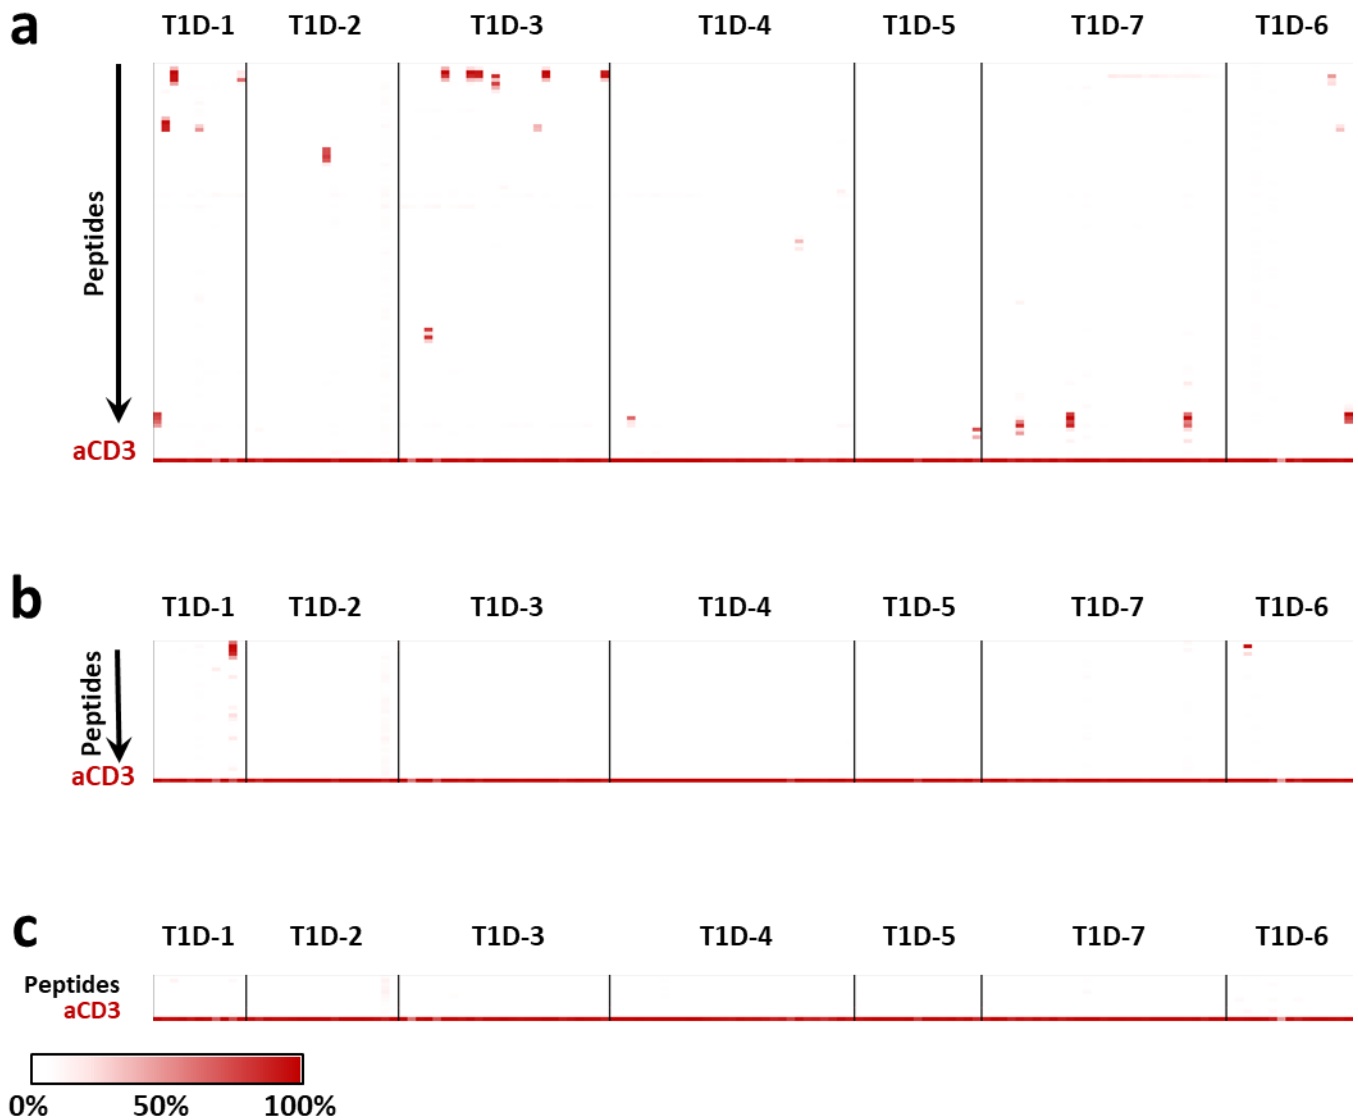

**Supplementary Figure 2: Screening of TCR clonotypes for the response to preproinsulin and other candidate peptides.** TCR transductants were cultured with (a) truncated preproinsulin peptide pools, (b) truncated insulin DRiP peptide pools, or (c) peptides known to be antigens for CD8 T-cells in peripheral blood of T1D patients, in the presence of autologous EBV-transformed B cells, followed by evaluation of ZsGreen-1 expression. Individual rows indicate each peptide pool (a & b) and peptide (c) designated in Supplementary Tables 2, 3, and 4, respectively, and individual columns indicate each TCR transductant from 7 T1D organ donors. Responses to each peptide or peptide pool by each TCR transductant were evaluated by percentages of ZsGreen-1 positive cells and are shown in heat maps. The bottom rows in individual heat maps show activation levels elicited by anti-CD3 antibodies.

### Supplementary Figure 3

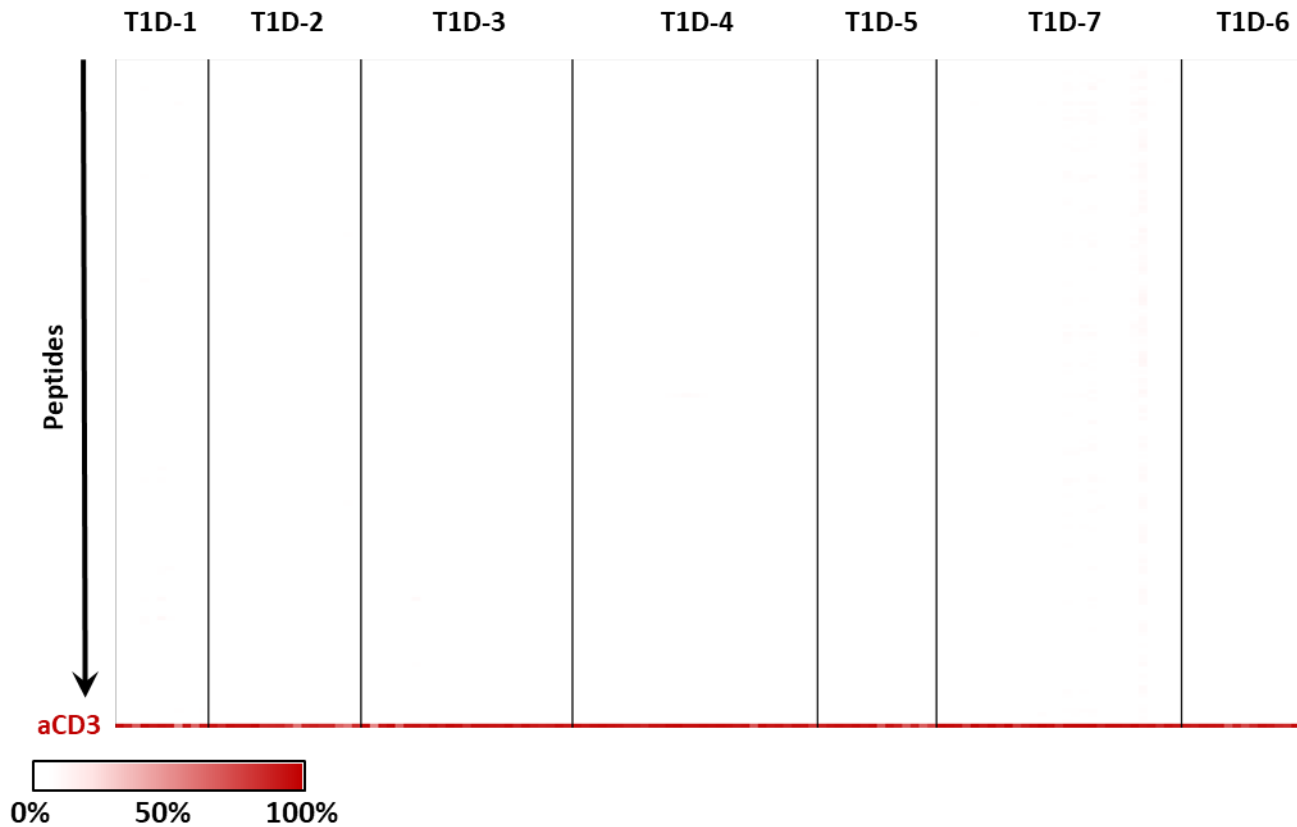

**Supplementary Figure 3: Screening of TCR clonotypes for the response to glucagon peptides.** TCR transductants were cultured with 173 truncated glucagon peptide pools in the presence of autologous EBV-transformed B cells, followed by evaluation of ZsGreen-1 expression. Individual rows indicate each peptide pool designated in Supplementary Table 5, and individual columns indicate each TCR transductant from 7 T1D organ donors. Responses to each peptide or peptide pool by each TCR transductant were evaluated by percentages of ZsGreen-1 positive cells and are shown in heat maps. The bottom rows in individual heat maps show activation levels elicited by anti-CD3 antibodies.

# Supplementary Figure 4

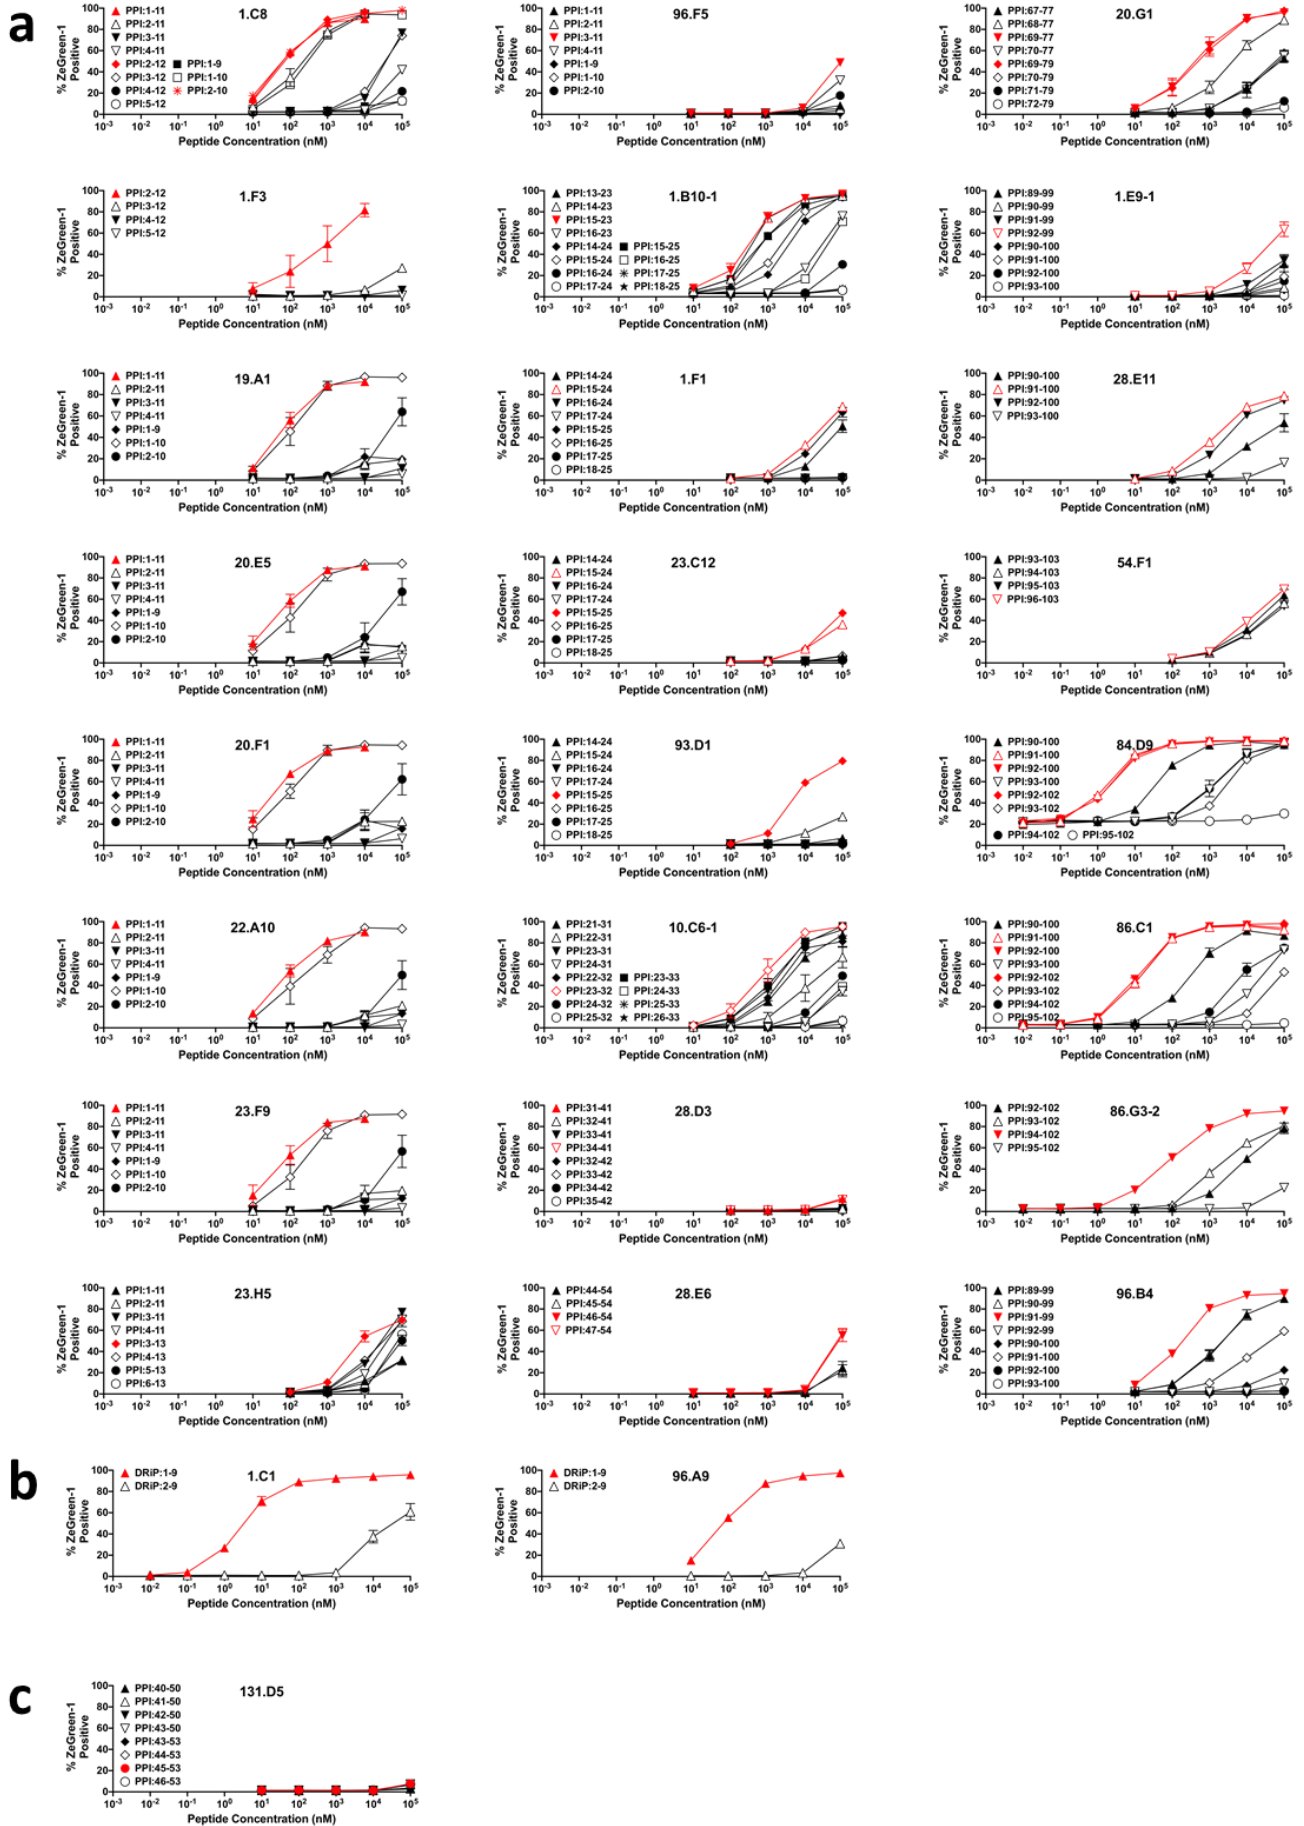

**Supplementary Figure 4: Titration analysis determining responses to preproinsulin and insulin DRiP peptides.** Preproinsulin and insulin DRiP-reactive TCR transductants were cultured with different concentrations of individual peptides contained in peptide pools that stimulated TCR transductants in the screening test. K562 cells expressing a cognate HLA class I molecule were used as antigen-presenting cells. Peptide sequences are indicated in Supplementary Table 6. Panels in **a**, **b**, and **c** show ZsGreen-1 expression levels in response to peptide stimulation for individual transductants expressing preproinsulin-reactive TCRs derived from T1D donors, insulin DRiP-reactive TCRs, and a preproinsulin-reactive TCR derived from a non-diabetic control donor, respectively.

## Supplementary Figure 5

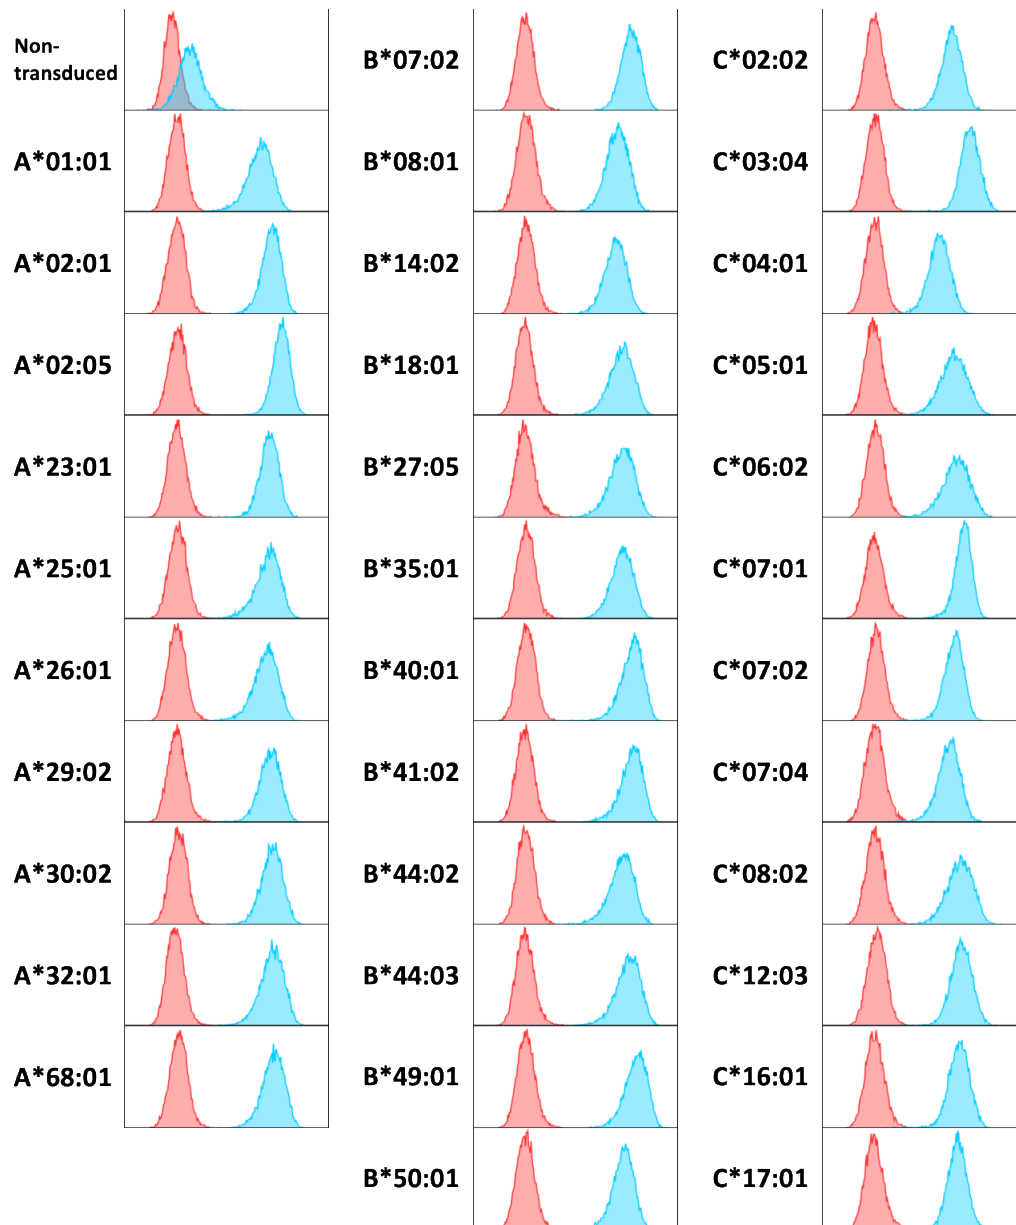

**Supplementary Figure 5: Expression of HLA class I molecules in antigen-presenting K562 cells.** K562 cells transduced with each HLA class I variant were stained with anti-beta2 microglobulin antibodies. Blue and red forms represent cells stained with and without the antibodies. Flow cytometry image data from one representative experiment of two independent experiments are shown.

## Supplementary Figure 6

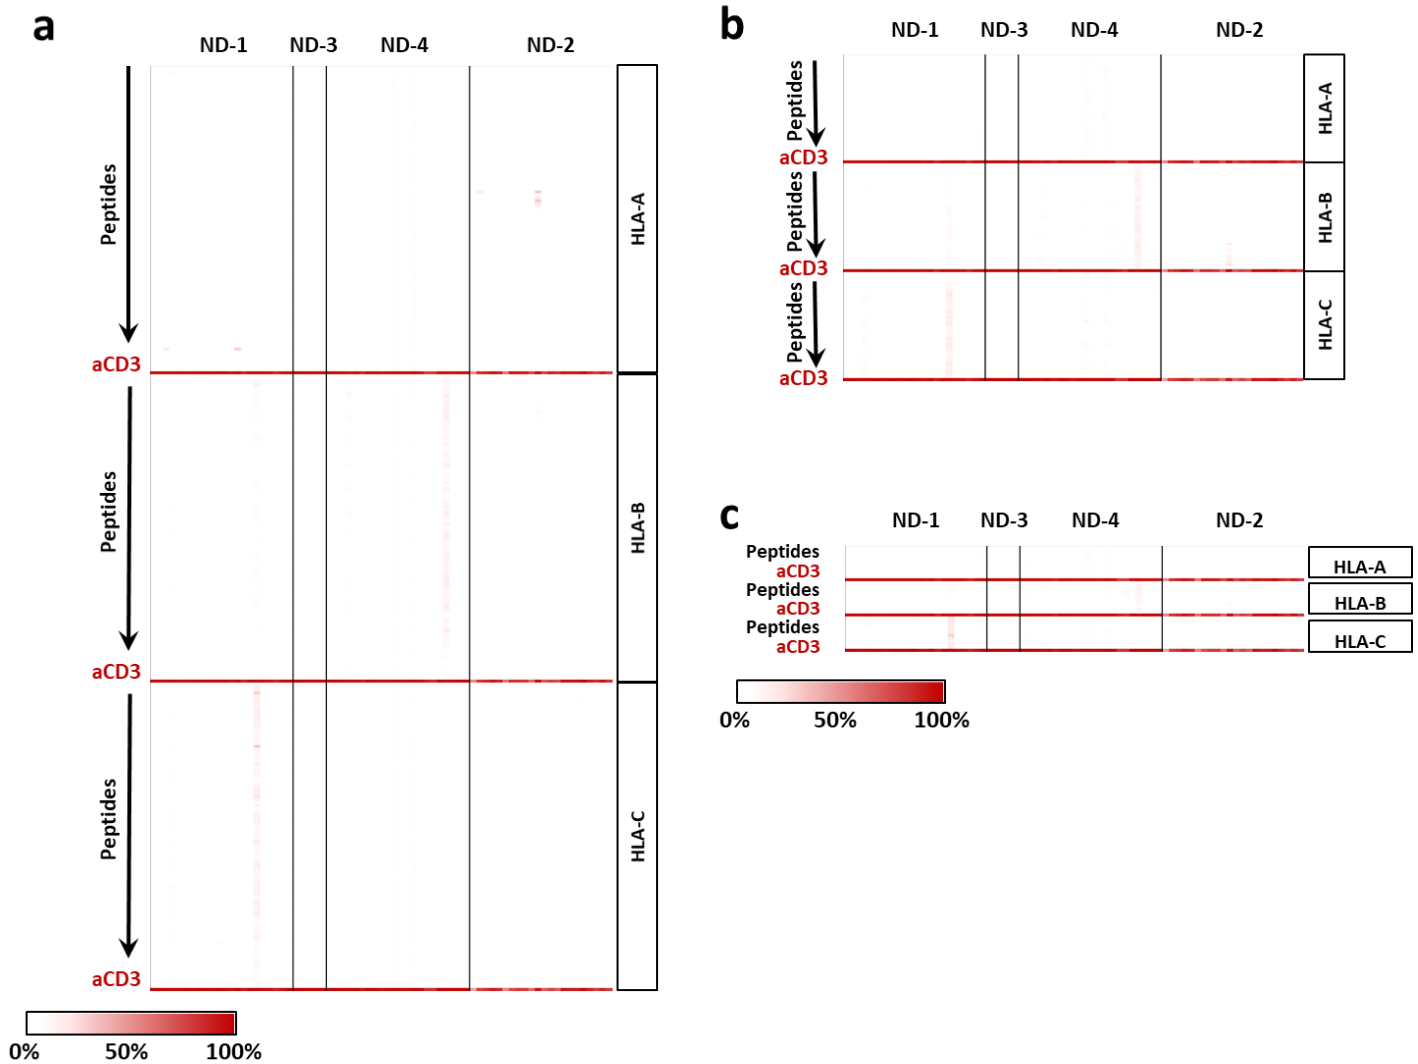

### Supplementary Figure 6: Screening of donors TCR clonotypes derived from non-diabetic control donors.

TCR transductants were cultured with (a) truncated preproinsulin peptide pools, (b) truncated insulin DRiP peptide pools, or (c) peptides known to be antigens for CD8 T-cells in peripheral blood of T1D patients, followed by evaluation of ZsGreen-1 expression. Mixture of two K562 cells expressing HLA-A, B, and C molecules of each cognate donor was used as antigen-presenting cells. HLA-A, B, and C typing results are indicated in Table 1. Individual rows indicate each peptide pool (a & b) and peptide (c) designated in Supplementary Tables 2, 3, and 4, respectively, and individual columns indicate each TCR transductant. Responses to each peptide or peptide pool by each TCR transductant were evaluated by percentages of ZsGreen-1 positive cells and are shown in heat maps. The bottom rows in individual heat maps show activation levels elicited by anti-CD3 antibodies.

## Supplementary Figure 7

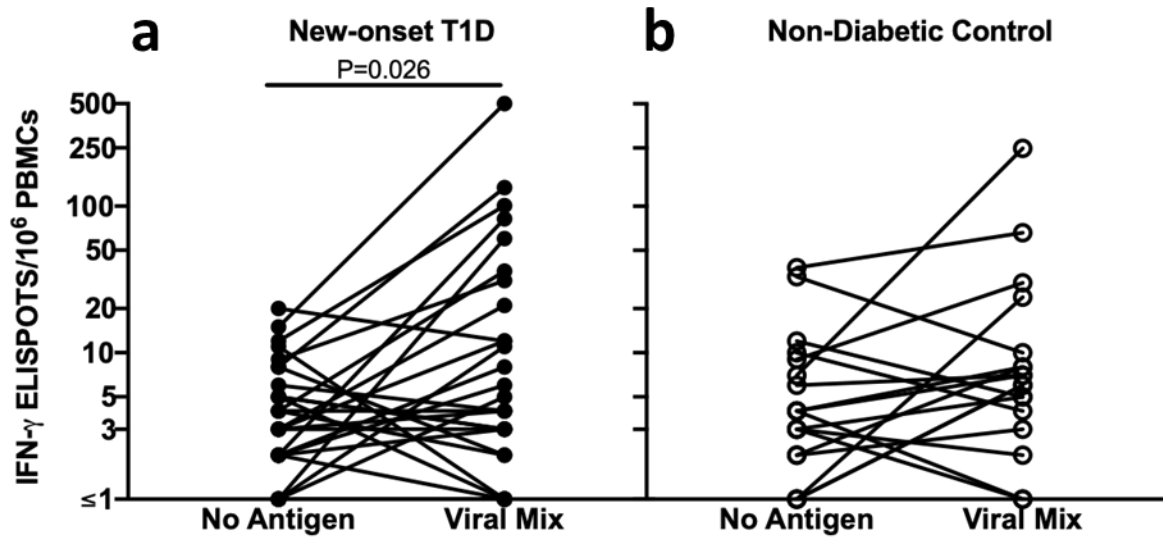

**Supplementary Figure 7: IFN- $\gamma$  ELISPOT responses to viral peptides using peripheral blood mononuclear cells.** Cryopreserved PBMCs were cultured in the presence or absence of a viral mix of peptides (CD8 T-cell epitopes from CMV, EBV, and Measles) for 48 hours, washed, and then cells transferred to an IFN- $\gamma$  monoclonal antibody-coated plate for overnight culture followed by development and enumeration of ELISPOTs. Comparison of no antigen to viral peptides for **(a)** new-onset T1D subjects (n=30) and **(b)** non-diabetic subjects (n=18). P=0.026 for new-onset T1D and p=0.164 for non-diabetic subjects using a Wilcoxon matched-pairs signed rank test.



**Supplementary Table 1: TCR clonotypes identified and studied**

| Donor Type           | Donor ID | Donor Reference     | No of islets sampled | No of T cells for which TCR $\alpha$ and/or $\beta$ identified | No of Unique clones | No of Clones to make transductants | No of TCR- $\alpha\beta$ pairs to make transductants | No of TCR- $\alpha\beta$ pairs not expressed | No of TCR- $\alpha\beta$ pairs having non-specific responses | No of TCR- $\alpha\beta$ pairs screened | No of unique clones screened |
|----------------------|----------|---------------------|----------------------|----------------------------------------------------------------|---------------------|------------------------------------|------------------------------------------------------|----------------------------------------------|--------------------------------------------------------------|-----------------------------------------|------------------------------|
| T1D                  | T1D-1    | nPOD 69             | 500                  | 46                                                             | 18                  | 10                                 | 12                                                   | 1                                            | 0                                                            | 11                                      | 10                           |
| T1D                  | T1D-2    | nPOD 6323           | 1750                 | 161                                                            | 108                 | 17                                 | 18                                                   | 0                                            | 0                                                            | 18                                      | 17                           |
| T1D                  | T1D-3    | nPOD 6342           | 500                  | 209                                                            | 154                 | 25                                 | 27                                                   | 2                                            | 0                                                            | 25                                      | 24                           |
| T1D                  | T1D-4    | nPOD 6367           | 5390                 | 199                                                            | 142                 | 27                                 | 32                                                   | 3                                            | 0                                                            | 29                                      | 26                           |
| T1D                  | T1D-5    | nPOD 6414           | 1000                 | 145                                                            | 117                 | 15                                 | 15                                                   | 0                                            | 0                                                            | 15                                      | 14                           |
| T1D                  | T1D-6    | nPOD 6472           | ~120                 | 304                                                            | 191                 | 14                                 | 17                                                   | 1                                            | 1                                                            | 15                                      | 14                           |
| T1D                  | T1D-7    | VUMC/<br>Pittsburgh | 6000                 | 238                                                            | 125                 | 28                                 | 30                                                   | 0                                            | 1                                                            | 29                                      | 27                           |
|                      |          | Total               |                      | 1302                                                           | 855                 | 136                                | 151                                                  | 7                                            | 2                                                            | 142                                     | 132                          |
| Non diabetic Control | ND-1     | iidp 9657           | 4000                 | 200                                                            | 84                  | 21                                 | 24                                                   | 2                                            | 0                                                            | 22                                      | 21                           |
| Non diabetic Control | ND-2     | iidp 1726           | 4000                 | 221                                                            | 101                 | 20                                 | 22                                                   | 0                                            | 0                                                            | 22                                      | 19                           |
| Non diabetic Control | ND-3     | R300                | 4000                 | 63                                                             | 49                  | 6                                  | 7                                                    | 1                                            | 1                                                            | 5                                       | 5                            |
| Non diabetic Control | ND-4     | R301                | 4000                 | 179                                                            | 138                 | 23                                 | 24                                                   | 0                                            | 2                                                            | 22                                      | 21                           |
| Non diabetic Control | ND-5     | IIDP 5642           | 4000                 | 91                                                             | 54                  | ND                                 | ND                                                   | ND                                           | ND                                                           | ND                                      | ND                           |
| Non diabetic Control | ND-6     | IIDP 7400           | 8000                 | 243                                                            | 136                 | ND                                 | ND                                                   | ND                                           | ND                                                           | ND                                      | ND                           |
| Non diabetic Control | ND-7     | R283                | 3000                 | TCR sequencing not performed                                   |                     |                                    |                                                      |                                              |                                                              |                                         |                              |
| Non diabetic Control |          | Total               |                      | 663                                                            | 372                 | 70                                 | 77                                                   | 3                                            | 3                                                            | 71                                      | 66                           |

**Supplementary Table 2: Preproinsulin Truncated peptide pools**

| Pool No | 11 Mer      | 10 Mer     | 9 Mer     | 8 Mer    |
|---------|-------------|------------|-----------|----------|
| 1       | -           | -          | -         | MALWMRLL |
| 2       | -           | -          | MALWMRLLP | ALWMRLLP |
| 3       | -           | MALWMRLLPL | ALWMRLLPL | LWMRLLPL |
| 4       | MALWMRLLPLL | ALWMRLLPLL | LWMRLLPLL | WMRLLPLL |
| 5       | ALWMRLLPLLA | LWMRLLPLLA | WMRLLPLLA | MRLLPLLA |
| 6       | LWMRLLPLLAL | WMRLLPLLAL | MRLLPLLAL | RLLPLLAL |
| 7       | WMRLLPLLALL | MRLLPLLALL | RLLPLLALL | LLPLLALL |
| 8       | MRLLPLLALLA | RLLPLLALLA | LLPLLALLA | LPLLALLA |
| 9       | RLLPLLALLAL | LLPLLALLAL | LPLLALLAL | PLLALLAL |
| 10      | LLPLLALLALW | LPLLALLALW | PLLALLALW | LLALLALW |
| 11      | LPLLALLALWG | PLLALLALWG | LLALLALWG | LALLALWG |
| 12      | PLLALLALWGP | LLALLALWGP | LALLALWGP | ALLALWGP |
| 13      | LLALLALWGPD | LALLALWGPD | ALLALWGPD | LLALWGPD |
| 14      | LALLALWGPDP | ALLALWGPDP | LLALWGPDP | LALWGPDP |
| 15      | ALLALWGPDPA | LLALWGPDPA | LALWGPDPA | ALWGPDPA |
| 16      | LLALWGPDPAA | LALWGPDPAA | ALWGPDPAA | LWGPDPAA |
| 17      | LALWGPDPAAA | ALWGPDPAAA | LWGPDPAAA | WGPDPAAA |
| 18      | ALWGPDPAAAF | LWGPDPAAAF | WGPDPAAAF | GDPDAAAF |
| 19      | LWGPDPAAAFV | WGPDPAAAFV | GDPDAAAFV | PDPAAAFV |
| 20      | WGPDPAAAFVN | GDPDAAAFVN | PDPAAAFVN | DPAAAFVN |
| 21      | GDPDAAAFVNQ | PDPAAAFVNQ | DPAAAFVNQ | PAAAFVNQ |
| 22      | PDPAAAFVNQH | DPAAAFVNQH | PAAAFVNQH | AAAFVNQH |
| 23      | DPAAAFVNQHL | PAAAFVNQHL | AAAFVNQHL | AAFVNQHL |
| 24      | PAAAFVNQHLC | AAAFVNQHLC | AAFVNQHLC | AFVNQHLC |
| 25      | AAAFVNQHLCG | AAFVNQHLCG | AFVNQHLCG | FVNQHLCG |
| 26      | AAFVNQHLCGS | AFVNQHLCGS | FVNQHLCGS | VNQHLCGS |
| 27      | AFVNQHLCGSH | FVNQHLCGSH | VNQHLCGSH | NQHLCGSH |
| 28      | FVNQHLCGSHL | VNQHLCGSHL | NQHLCGSHL | QHLCGSHL |
| 29      | VNQHLCGSHLV | NQHLCGSHLV | QHLCGSHLV | HLCGSHLV |
| 30      | NQHLCGSHLVE | QHLCGSHLVE | HLCGSHLVE | LCGSHLVE |
| 31      | QHLCGSHLVEA | HLCGSHLVEA | LCGSHLVEA | CGSHLVEA |
| 32      | HLCGSHLVEAL | LCGSHLVEAL | CGSHLVEAL | GSHLVEAL |
| 33      | LCGSHLVEALY | CGSHLVEALY | GSHLVEALY | SHLVEALY |
| 34      | CGSHLVEALYL | GSHLVEALYL | SHLVEALYL | HLVEALYL |
| 35      | GSHLVEALYLV | SHLVEALYLV | HLVEALYLV | LVEALYLV |
| 36      | SHLVEALYLVC | HLVEALYLVC | LVEALYLVC | VEALYLVC |
| 37      | HLVEALYLVCG | LVEALYLVCG | VEALYLVCG | EALYLVCG |
| 38      | LVEALYLVCGE | VEALYLVCGE | EALYLVCGE | ALYLVCGE |
| 39      | VEALYLVCGER | EALYLVCGER | ALYLVCGER | LYLVCGER |
| 40      | EALYLVCGERG | ALYLVCGERG | LYLVCGERG | YLVCGERG |
| 41      | ALYLVCGERGF | LYLVCGERGF | YLVCGERGF | LVCGERGF |
| 42      | LYLVCGERGFF | YLVCGERGFF | LVCGERGFF | VCGERGFF |
| 43      | YLVCGERGFFY | LVCGERGFFY | VCGERGFFY | CGERGFFY |

|    |              |            |            |           |
|----|--------------|------------|------------|-----------|
| 44 | LVCGERGFFYT  | VCGERGFFYT | CGERGFFYT  | GERGFFYT  |
| 45 | VCGERGFFYTP  | CGERGFFYTP | GERGFFYTP  | ERGFFYTP  |
| 46 | CGERGFFYTPK  | GERGFFYTPK | ERGFFYTPK  | RGFFYTPK  |
| 47 | GERGFFYTPKT  | ERGFFYTPKT | RGFFYTPKT  | GFFYTPKT  |
| 48 | ERGFFYTPKTR  | RGFFYTPKTR | GFFYTPKTR  | FFYTPKTR  |
| 49 | RGFFYTPKTRR  | GFFYTPKTRR | FFYTPKTRR  | FYTPKTRR  |
| 50 | GFFYTPKTRRE  | FFYTPKTRRE | FYTPKTRRE  | YTPKTRRE  |
| 51 | FFYTPKTRREA  | FYTPKTRREA | YTPKTRREA  | TPKTRREA  |
| 52 | FYTPKTRREAE  | YTPKTRREAE | TPKTRREAE  | PKTRREAE  |
| 53 | YTPKTRREAED  | TPKTRREAED | PKTRREAED  | KTRREAED  |
| 54 | TPKTRREAEDL  | PKTRREAEDL | KTRREAEDL  | TRREAEDL  |
| 55 | PKTRREAEDLQ  | KTRREAEDLQ | TRREAEDLQ  | RREAEDLQ  |
| 56 | KTRREAEDLQV  | TRREAEDLQV | RREAEDLQV  | REAEDLQV  |
| 57 | TRREAEDLQVG  | RREAEDLQVG | REAEDLQVG  | EAEDLQVG  |
| 58 | RREAEDLQVGQ  | REAEDLQVGQ | EAEDLQVGQ  | AEDLQVGQ  |
| 59 | REAEDLQVGQV  | EAEDLQVGQV | AEDLQVGQV  | EDLQVGQV  |
| 60 | EAEDLQVGQVE  | AEDLQVGQVE | EDLQVGQVE  | DLQVGQVE  |
| 61 | AEDLQVGQVEL  | EDLQVGQVEL | DLQVGQVEL  | LQVGQVEL  |
| 62 | EDLQVGQVELG  | DLQVGQVELG | LQVGQVELG  | QVGQVELG  |
| 63 | DLQVGQVELGG  | LQVGQVELGG | QVGQVELGG  | VGQVELGG  |
| 64 | LQVGQVELGGG  | QVGQVELGGG | VGQVELGGG  | GQVELGGG  |
| 65 | QVGQVELGGGP  | VGQVELGGGP | GQVELGGGP  | QVELGGGP  |
| 66 | VGQVELGGGPG  | GQVELGGGPG | QVELGGGPG  | VELGGGPG  |
| 67 | GQVELGGGPGA  | QVELGGGPGA | VELGGGPGA  | ELGGGPGA  |
| 68 | QVELGGGPGAG  | VELGGGPGAG | ELGGGPGAG  | LGGGPGAG  |
| 69 | VELGGGPGAGS  | ELGGGPGAGS | LGGGPGAGS  | GGGPGAGS  |
| 70 | ELGGGPGAGSL  | LGGGPGAGSL | GGGPGAGSL  | GGPGAGSL  |
| 71 | LGGGPGAGSLQ  | GGGPGAGSLQ | GGPGAGSLQ  | GPGAGSLQ  |
| 72 | GGGPGAGSLQP  | GGPGAGSLQP | GPGAGSLQP  | PGAGSLQP  |
| 73 | GGPGAGSLQPL  | GPGAGSLQPL | PGAGSLQPL  | GAGSLQPL  |
| 74 | GPGAGSLQPLA  | PGAGSLQPLA | GAGSLQPLA  | AGSLQPLA  |
| 75 | PGAGSLQPLAL  | GAGSLQPLAL | AGSLQPLAL  | GSLQPLAL  |
| 76 | GAGSLQPLALE  | AGSLQPLALE | GSLQPLALE  | SLQPLALE  |
| 77 | AGSLQPLALEG  | GSLQPLALEG | SLQPLALEG  | LQPLALEG  |
| 78 | GSLQPLALEGS  | SLQPLALEGS | LQPLALEGS  | QPLALEGS  |
| 79 | SLQPLALEGSL  | LQPLALEGSL | QPLALEGSL  | PLALEGSL  |
| 80 | LQPLALEGSLQ  | QPLALEGSLQ | PLALEGSLQ  | LALEGSLQ  |
| 81 | QPLALEGSLQK  | PLALEGSLQK | LALEGSLQK  | ALEGSLQK  |
| 82 | PLALEGSLQKR  | LALEGSLQKR | ALEGSLQKR  | LEGLQKR   |
| 83 | LALEGSLQKRG  | ALEGSLQKRG | LEGLQKRG   | EGSLQKRG  |
| 84 | ALEGSLQKRG I | LEGLQKRG I | EGSLQKRG I | GSLQKRG I |
| 85 | LEGLQKRGIV   | EGSLQKRGIV | GSLQKRGIV  | SLQKRGIV  |
| 86 | EGSLQKRGIVE  | GSLQKRGIVE | SLQKRGIVE  | LQKRGIVE  |
| 87 | GSLQKRGIVEQ  | SLQKRGIVEQ | LQKRGIVEQ  | QKRGIVEQ  |
| 88 | SLQKRGIVEQC  | LQKRGIVEQC | QKRGIVEQC  | KRGIVEQC  |
| 89 | LQKRGIVEQCC  | QKRGIVEQCC | KRGIVEQCC  | RGIVEQCC  |

|     |             |            |           |          |
|-----|-------------|------------|-----------|----------|
| 90  | QKRGIVEQCCT | KRGIVEQCCT | RGIVEQCCT | GIVEQCCT |
| 91  | KRGIVEQCCTS | RGIVEQCCTS | GIVEQCCTS | IVEQCCTS |
| 92  | RGIVEQCCTSI | GIVEQCCTSI | IVEQCCTSI | VEQCCTSI |
| 93  | GIVEQCCTSIC | IVEQCCTSIC | VEQCCTSIC | EQCCTSIC |
| 94  | IVEQCCTSICS | VEQCCTSICS | EQCCTSICS | QCCTSICS |
| 95  | VEQCCTSICSL | EQCCTSICSL | QCCTSICSL | CCTSICSL |
| 96  | EQCCTSICSLY | QCCTSICSLY | CCTSICSLY | CTSICSLY |
| 97  | QCCTSICSLYQ | CCTSICSLYQ | CTSICSLYQ | TSICSLYQ |
| 98  | CCTSICSLYQL | CTSICSLYQL | TSICSLYQL | SICSLYQL |
| 99  | CTSICSLYQLE | TSICSLYQLE | SICSLYQLE | ICSLYQLE |
| 100 | TSICSLYQLEN | SICSLYQLEN | ICSLYQLEN | CSLYQLEN |
| 101 | SICSLYQLENY | ICSLYQLENY | CSLYQLENY | SLYQLENY |
| 102 | ICSLYQLENYC | CSLYQLENYC | SLYQLENYC | LYQLENYC |
| 103 | CSLYQLENYCN | SLYQLENYCN | LYQLENYCN | YQLENYCN |

**Supplementary Table 3: Insulin DRiP Truncated peptide pools**

| Pool No | 11 Mer      | 10 Mer     | 9 Mer     | 8 Mer    |
|---------|-------------|------------|-----------|----------|
| 1       |             |            |           | MLYQHLLP |
| 2       |             |            | MLYQHLLPL | LYQHLLPL |
| 3       |             | MLYQHLLPLP | LYQHLLPLP | YQHLLPLP |
| 4       | MLYQHLLPLPA | LYQHLLPLPA | YQHLLPLPA | QHLLPLPA |
| 5       | LYQHLLPLPAG | YQHLLPLPAG | QHLLPLPAG | HLLPLPAG |
| 6       | YQHLLPLPAGE | QHLLPLPAGE | HLLPLPAGE | LLPLPAGE |
| 7       | QHLLPLPAGEL | HLLPLPAGEL | LLPLPAGEL | LPLPAGEL |
| 8       | HLLPLPAGELL | LLPLPAGELL | LPLPAGELL | PLPAGELL |
| 9       | LLPLPAGELLQ | LPLPAGELLQ | PLPAGELLQ | LPAGELLQ |
| 10      | LPLPAGELLQL | PLPAGELLQL | LPAGELLQL | PAGELLQL |
| 11      | PLPAGELLQLD | LPAGELLQLD | PAGELLQLD | AGELLQLD |
| 12      | LPAGELLQLDA | PAGELLQLDA | AGELLQLDA | GELLQLDA |
| 13      | PAGELLQLDAA | AGELLQLDAA | GELLQLDAA | ELLQLDAA |
| 14      | AGELLQLDAAC | GELLQLDAAC | ELLQLDAAC | LLQLDAAC |
| 15      | GELLQLDAACR | ELLQLDAACR | LLQLDAACR | LQLDAACR |
| 16      | ELLQLDAACRQ | LLQLDAACRQ | LQLDAACRQ | QLDAACRQ |
| 17      | LLQLDAACRQP | LQLDAACRQP | QLDAACRQP | LDAACRQP |
| 18      | LQLDAACRQPH | QLDAACRQPH | LDAACRQPH | DAACRQPH |
| 19      | QLDAACRQPHT | LDAACRQPHT | DAACRQPHT | AACRQPHT |
| 20      | LDAACRQPHTR | DAACRQPHTR | AACRQPHTR | ACRQPHTR |
| 21      | DAACRQPHTRR | AACRQPHTRR | ACRQPHTRR | CRQPHTRR |
| 22      | AACRQPHTRRL | ACRQPHTRRL | CRQPHTRRL | RQPHTRRL |
| 23      | ACRQPHTRRL  | CRQPHTRRL  | RQPHTRRL  | QPHTRRL  |
| 24      | CRQPHTRRLH  | RQPHTRRLH  | QPHTRRLH  | PHTRRLH  |
| 25      | RQPHTRRLHR  | QPHTRRLHR  | PHTRRLHR  | HTRRLHR  |
| 26      | QPHTRRLHRE  | PHTRRLHRE  | HTRRLHRE  | TRRLHRE  |
| 27      | PHTRRLHRER  | HTRRLHRER  | TRRLHRER  | RRLHRER  |
| 28      | HTRRLHRERW  | TRRLHRERW  | RRLHRERW  | RLLHRERW |
| 29      | TRRLHRERWN  | RRLHRERWN  | RLLHRERWN | LLHRERWN |
| 30      | RRLHRERWNK  | RLLHRERWNK | LLHRERWNK | LHRERWNK |
| 31      | RLLHRERWNKA | LLHRERWNKA | LHRERWNKA | HRERWNKA |
| 32      | LLHRERWNKAL | LHRERWNKAL | HRERWNKAL | RERWNKAL |
| 33      | LHRERWNKALE | HRERWNKALE | RERWNKALE | ERWNKALE |
| 34      | HRERWNKALEP | RERWNKALEP | ERWNKALEP | RWNKALEP |
| 35      | RERWNKALEPA | ERWNKALEPA | RWNKALEPA | WNKALEPA |
| 36      | ERWNKALEPAK | RWNKALEPAK | WNKALEPAK | NKALEPAK |

## Supplementary Table 4: A2-restricted epitopes known to be associated with T1D

| Peptide Name | Sequence    |
|--------------|-------------|
| GAD:536-545  | RMMMEYGTTMV |
| GAD:114-123  | VMNILLQYVV  |
| IA2:797-805  | MVWESGCTV   |
| IA2:172-180  | SLSPLQAEL   |
| IA2:482-490  | SLAAGVKLL   |
| IAPP:9-17    | FLIVLSVAL   |
| IGRP:215-223 | FLFAVGFYL   |
| IGRP:228-236 | LNIDLLWSV   |
| IGRP:265-273 | VLFGLGFAI   |
| ZnT8:153-161 | VVTGVLVYL   |
| ZnT8:186-194 | VAANIVLTV   |

**Supplementary Table 5: Glucagon Truncated peptide pools**

| Pool No | 11 Mer      | 10 Mer     | 9 Mer     | 8 Mer    |
|---------|-------------|------------|-----------|----------|
| 1       | MKSIYFVAGLF | KSIYFVAGLF | SIYFVAGLF | IYFVAGLF |
| 2       | KSIYFVAGLFV | SIYFVAGLFV | IYFVAGLFV | YFVAGLFV |
| 3       | SIYFVAGLFVM | IYFVAGLFVM | YFVAGLFVM | FVAGLFVM |
| 4       | MKSIYFVAGLF | KSIYFVAGLF | SIYFVAGLF | IYFVAGLF |
| 5       | KSIYFVAGLFV | SIYFVAGLFV | IYFVAGLFV | YFVAGLFV |
| 6       | SIYFVAGLFVM | IYFVAGLFVM | YFVAGLFVM | FVAGLFVM |
| 7       | IYFVAGLFVML | YFVAGLFVML | FVAGLFVML | VAGLFVML |
| 8       | YFVAGLFVMLV | FVAGLFVMLV | VAGLFVMLV | AGLFVMLV |
| 9       | FVAGLFVMLVQ | VAGLFVMLVQ | AGLFVMLVQ | GLFVMLVQ |
| 10      | VAGLFVMLVQG | AGLFVMLVQG | GLFVMLVQG | LFVMLVQG |
| 11      | AGLFVMLVQGS | GLFVMLVQGS | LFVMLVQGS | FVMLVQGS |
| 12      | GLFVMLVQGSW | LFVMLVQGSW | FVMLVQGSW | VMLVQGSW |
| 13      | LFVMLVQGSWQ | FVMLVQGSWQ | VMLVQGSWQ | MLVQGSWQ |
| 14      | FVMLVQGSWQR | VMLVQGSWQR | MLVQGSWQR | LVQGSWQR |
| 15      | VMLVQGSWQRS | MLVQGSWQRS | LVQGSWQRS | VQGSWQRS |
| 16      | MLVQGSWQRSL | LVQGSWQRSL | VQGSWQRSL | QGSWQRSL |
| 17      | LVQGSWQRSLQ | VQGSWQRSLQ | QGSWQRSLQ | GSWQRSLQ |
| 18      | VQGSWQRSLQD | QGSWQRSLQD | GSWQRSLQD | SWQRSLQD |
| 19      | QGSWQRSLQDT | GSWQRSLQDT | SWQRSLQDT | WQRSLQDT |
| 20      | GSWQRSLQDTE | SWQRSLQDTE | WQRSLQDTE | QRSLQDTE |
| 21      | SWQRSLQDTEE | WQRSLQDTEE | QRSLQDTEE | RSLQDTEE |
| 22      | WQRSLQDTEEK | QRSLQDTEEK | RSLQDTEEK | SLQDTEEK |
| 23      | QRSLQDTEEKS | RSLQDTEEKS | SLQDTEEKS | LQDTEEKS |
| 24      | RSLQDTEEKSR | SLQDTEEKSR | LQDTEEKSR | QDTEEKSR |
| 25      | SLQDTEEKSR  | LQDTEEKSR  | QDTEEKSR  | DTEEKSR  |
| 26      | LQDTEEKSRSF | QDTEEKSRSF | DTEEKSRSF | TEEKSRSF |
| 27      | QDTEEKSRSFS | DTEEKSRSFS | TEEKSRSFS | EEKSRSFS |
| 28      | DTEEKSRSFSA | TEEKSRSFSA | EEKSRSFSA | EKSRSFSA |
| 29      | TEEKSRSFSA  | EEKSRSFSA  | EKSRSFSA  | KSRSFSA  |
| 30      | EEKSRSFSAQ  | EKSRSFSAQ  | KSRSFSAQ  | SRSFSASQ |
| 31      | EKSRSFSAQA  | KSRSFSAQA  | SRSFSASQA | RSFSASQA |
| 32      | KSRSFSAQAD  | SRSFSASQAD | RSFSASQAD | SFSASQAD |
| 33      | SRSFSASQADP | RSFSASQADP | SFSASQADP | FSASQADP |
| 34      | RSFSASQADPL | SFSASQADPL | FSASQADPL | SASQADPL |
| 35      | SFSASQADPLS | FSASQADPLS | SASQADPLS | ASQADPLS |
| 36      | FSASQADPLSD | SASQADPLSD | ASQADPLSD | SQADPLSD |
| 37      | SASQADPLSDP | ASQADPLSDP | SQADPLSDP | QADPLSDP |
| 38      | ASQADPLSDPD | SQADPLSDPD | QADPLSDPD | ADPLSDPD |
| 39      | SQADPLSDPDQ | QADPLSDPDQ | ADPLSDPDQ | DPLSDPDQ |
| 40      | QADPLSDPDQM | ADPLSDPDQM | DPLSDPDQM | PLSDPDQM |
| 41      | ADPLSDPDQMN | DPLSDPDQMN | PLSDPDQMN | LSDPDQMN |
| 42      | DPLSDPDQMNE | PLSDPDQMNE | LSDPDQMNE | SDPDQMNE |
| 43      | PLSDPDQMNE  | LSDPDQMNE  | SDPDQMNE  | DPDQMNE  |

|    |              |             |            |           |
|----|--------------|-------------|------------|-----------|
| 44 | LSDPDQMNE DK | SDPDQMNE DK | DPDQMNE DK | PDQMNE DK |
| 45 | SDPDQMNE DKR | DPDQMNE DKR | PDQMNE DKR | DQMNE DKR |
| 46 | DPDQMNE DKRH | PDQMNE DKRH | DQMNE DKRH | QMNE DKRH |
| 47 | PDQMNE DKRHS | DQMNE DKRHS | QMNE DKRHS | MNE DKRHS |
| 48 | DQMNE DKRHSQ | QMNE DKRHSQ | MNE DKRHSQ | NE DKRHSQ |
| 49 | QMNE DKRHSQG | MNE DKRHSQG | NE DKRHSQG | EDKRHSQG  |
| 50 | MNE DKRHSQGT | NE DKRHSQGT | EDKRHSQGT  | DKRHSQGT  |
| 51 | NE DKRHSQGTG | EDKRHSQGTG  | DKRHSQGTG  | KRHSQGTG  |
| 52 | EDKRHSQGTFT  | DKRHSQGTFT  | KRHSQGTFT  | RHSQGTFT  |
| 53 | DKRHSQGTFTS  | KRHSQGTFTS  | RHSQGTFTS  | HSQGTFTS  |
| 54 | KRHSQGTFTSD  | RHSQGTFTSD  | HSQGTFTSD  | SQGTFTSD  |
| 55 | RHSQGTFTSDY  | HSQGTFTSDY  | SQGTFTSDY  | QGTFTSDY  |
| 56 | HSQGTFTSDYS  | SQGTFTSDYS  | QGTFTSDYS  | GTFTSDYS  |
| 57 | SQGTFTSDYSK  | QGTFTSDYSK  | GTFTSDYSK  | TFTSDYSK  |
| 58 | QGTFTSDYSKY  | GTFTSDYSKY  | TFTSDYSKY  | FTSDYSKY  |
| 59 | GTFTSDYSKYL  | TFTSDYSKYL  | FTSDYSKYL  | TSDYSKYL  |
| 60 | TFTSDYSKYLD  | FTSDYSKYLD  | TSDYSKYLD  | SDYSKYLD  |
| 61 | FTSDYSKYLDS  | TSDYSKYLDS  | SDYSKYLDS  | DYSKYLDS  |
| 62 | TSDYSKYLDSR  | SDYSKYLDSR  | DYSKYLDSR  | YSKYLDSR  |
| 63 | SDYSKYLDSRR  | DYSKYLDSRR  | YSKYLDSRR  | SKYLDSRR  |
| 64 | DYSKYLDSRRA  | YSKYLDSRRA  | SKYLDSRRA  | KYLDSRRA  |
| 65 | YSKYLDSRRAQ  | SKYLDSRRAQ  | KYLDSRRAQ  | YLDSRRAQ  |
| 66 | SKYLDSRRAQD  | KYLDSRRAQD  | YLDSRRAQD  | LDSRRAQD  |
| 67 | KYLDSRRAQDF  | YLDSRRAQDF  | LDSRRAQDF  | DSRRAQDF  |
| 68 | YLDSRRAQDFV  | LDSRRAQDFV  | DSRRAQDFV  | SRRAQDFV  |
| 69 | LDSRRAQDFVQ  | DSRRAQDFVQ  | SRRAQDFVQ  | RRAQDFVQ  |
| 70 | DSRRAQDFVQW  | SRRAQDFVQW  | RRAQDFVQW  | RAQDFVQW  |
| 71 | SRRAQDFVQWL  | RRAQDFVQWL  | RAQDFVQWL  | AQDFVQWL  |
| 72 | RRAQDFVQWLM  | RAQDFVQWLM  | AQDFVQWLM  | QDFVQWLM  |
| 73 | RAQDFVQWLMN  | AQDFVQWLMN  | QDFVQWLMN  | DFVQWLMN  |
| 74 | AQDFVQWLMNT  | QDFVQWLMNT  | DFVQWLMNT  | FVQWLMNT  |
| 75 | QDFVQWLMNTK  | DFVQWLMNTK  | FVQWLMNTK  | VQWLMNTK  |
| 76 | DFVQWLMNTKR  | FVQWLMNTKR  | VQWLMNTKR  | QWLMNTKR  |
| 77 | FVQWLMNTKRN  | VQWLMNTKRN  | QWLMNTKRN  | WLMNTKRN  |
| 78 | VQWLMNTKRNR  | QWLMNTKRNR  | WLMNTKRNR  | LMNTKRNR  |
| 79 | QWLMNTKRNRN  | WLMNTKRNRN  | LMNTKRNRN  | MNTKRNRN  |
| 80 | WLMNTKRNRNN  | LMNTKRNRNN  | MNTKRNRNN  | NTKRNRNN  |
| 81 | LMNTKRNRNNI  | MNTKRNRNNI  | NTKRNRNNI  | TKRNRNNI  |
| 82 | MNTKRNRNNIA  | NTKRNRNNIA  | TKRNRNNIA  | KRNRNNIA  |
| 83 | NTKRNRNNIAK  | TKRNRNNIAK  | KRNRNNIAK  | RNRNNIAK  |
| 84 | TKRNRNNIAKR  | KRNRNNIAKR  | RNRNNIAKR  | NRNNIAKR  |
| 85 | KRNRNNIAKRH  | RNRNNIAKRH  | NRNNIAKRH  | RNNIAKRH  |
| 86 | RNRNNIAKRHD  | NRNNIAKRHD  | RNNIAKRHD  | NNIAKRHD  |
| 87 | NRNNIAKRHDE  | RNNIAKRHDE  | NNIAKRHDE  | NIKRHDE   |
| 88 | RNNIAKRHDEF  | NNIAKRHDEF  | NIKRHDEF   | IAKRHDEF  |
| 89 | NNIAKRHDEFE  | NIKRHDEFE   | IAKRHDEFE  | AKRHDEFE  |



|     |             |            |           |          |
|-----|-------------|------------|-----------|----------|
| 90  | NIAKRHDEFER | IAKRHDEFER | AKRHDEFER | KRHDEFER |
| 91  | IAKRHDEFERH | AKRHDEFERH | KRHDEFERH | RHDEFERH |
| 92  | AKRHDEFERHA | KRHDEFERHA | RHDEFERHA | HDEFERHA |
| 93  | KRHDEFERHAE | RHDEFERHAE | HDEFERHAE | DEFERHAE |
| 94  | RHDEFERHAEG | HDEFERHAEG | DEFERHAEG | EFERHAEG |
| 95  | HDEFERHAEGT | DEFERHAEGT | EFERHAEGT | FERHAEGT |
| 96  | DEFERHAEGTF | EFERHAEGTF | FERHAEGTF | ERHAEGTF |
| 97  | EFERHAEGTFT | FERHAEGTFT | ERHAEGTFT | RHAEGTFT |
| 98  | FERHAEGTFTS | ERHAEGTFTS | RHAEGTFTS | HAEGTFTS |
| 99  | ERHAEGTFTSD | RHAEGTFTSD | HAEGTFTSD | AEGTFTSD |
| 100 | RHAEGTFTSDV | HAEGTFTSDV | AEGTFTSDV | EGTFTSDV |
| 101 | HAEGTFTSDVS | AEGTFTSDVS | EGTFTSDVS | GTFTSDVS |
| 102 | AEGTFTSDVSS | EGTFTSDVSS | GTFTSDVSS | TFTSDVSS |
| 103 | EGTFTSDVSSY | GTFTSDVSSY | TFTSDVSSY | FTSDVSSY |
| 104 | GTFTSDVSSYL | TFTSDVSSYL | FTSDVSSYL | TSDVSSYL |
| 105 | TFTSDVSSYLE | FTSDVSSYLE | TSDVSSYLE | SDVSSYLE |
| 106 | FTSDVSSYLEG | TSDVSSYLEG | SDVSSYLEG | DVSSYLEG |
| 107 | TSDVSSYLEGQ | SDVSSYLEGQ | DVSSYLEGQ | VSSYLEGQ |
| 108 | SDVSSYLEGQA | DVSSYLEGQA | VSSYLEGQA | SSYLEGQA |
| 109 | DVSSYLEGQAA | VSSYLEGQAA | SSYLEGQAA | SYLEGQAA |
| 110 | VSSYLEGQAAK | SSYLEGQAAK | SYLEGQAAK | YLEGQAAK |
| 111 | SSYLEGQAAKE | SYLEGQAAKE | YLEGQAAKE | LEGQAAKE |
| 112 | SYLEGQAAKEF | YLEGQAAKEF | LEGQAAKEF | EGQAAKEF |
| 113 | YLEGQAAKEFI | LEGQAAKEFI | EGQAAKEFI | GQAAKEFI |
| 114 | LEGQAAKEFIA | EGQAAKEFIA | GQAAKEFIA | QAAKEFIA |
| 115 | EGQAAKEFIAW | GQAAKEFIAW | QAAKEFIAW | AAKEFIAW |
| 116 | GQAAKEFIAWL | QAAKEFIAWL | AAKEFIAWL | AKEFIAWL |
| 117 | QAAKEFIAWLV | AAKEFIAWLV | AKEFIAWLV | KEFIAWLV |
| 118 | AAKEFIAWLVK | AKEFIAWLVK | KEFIAWLVK | EFIAWLVK |
| 119 | AKEFIAWLVKG | KEFIAWLVKG | EFIAWLVKG | FIAWLVKG |
| 120 | KEFIAWLVKGR | EFIAWLVKGR | FIAWLVKGR | IAWLVKGR |
| 121 | EFIAWLVKGRG | FIAWLVKGRG | IAWLVKGRG | AWLVKGRG |
| 122 | FIAWLVKGRGR | IAWLVKGRGR | AWLVKGRGR | WLVKGRGR |
| 123 | IAWLVKGRGRR | AWLVKGRGRR | WLVKGRGRR | LVKGRGRR |
| 124 | AWLVKGRGRRD | WLVKGRGRRD | LVKGRGRRD | VKGRGRRD |
| 125 | WLVKGRGRRDF | LVKGRGRRDF | VKGRGRRDF | KGRGRRDF |
| 126 | LVKGRGRRDFP | VKGRGRRDFP | KGRGRRDFP | GRGRRDFP |
| 127 | VKGRGRRDFPE | KGRGRRDFPE | GRGRRDFPE | RGRRDFPE |
| 128 | KGRGRRDFPEE | GRGRRDFPEE | RGRRDFPEE | GRRDFPEE |
| 129 | GRGRRDFPEEV | RGRRDFPEEV | GRRDFPEEV | RRDFPEEV |
| 130 | RGRRDFPEEVA | GRRDFPEEVA | RRDFPEEVA | RDFPEEVA |
| 131 | GRRDFPEEVAI | RRDFPEEVAI | RDFPEEVAI | DFPEEVAI |
| 132 | RRDFPEEVAIV | RDFPEEVAIV | DFPEEVAIV | FPEEVAIV |
| 133 | RDFPEEVAIVE | DFPEEVAIVE | FPEEVAIVE | PEEVAIVE |
| 134 | DFPEEVAIVEE | FPEEVAIVEE | PEEVAIVEE | EEVAIVEE |
| 135 | FPEEVAIVEEL | PEEVAIVEEL | EEVAIVEEL | EVAIVEEL |

|     |              |             |            |           |
|-----|--------------|-------------|------------|-----------|
| 136 | PEEVAIVEELG  | EEVAIVEELG  | EVAIVEELG  | VAIVEELG  |
| 137 | EEVAIVEELGR  | EVAIVEELGR  | VAIVEELGR  | AIVEELGR  |
| 138 | EVAIVEELGRR  | VAIVEELGRR  | AIVEELGRR  | IVEELGRR  |
| 139 | VAIVEELGRRH  | AIVEELGRRH  | IVEELGRRH  | VEELGRRH  |
| 140 | AIVEELGRRHA  | IVEELGRRHA  | VEELGRRHA  | EELGRRHA  |
| 141 | IVEELGRRHAD  | VEELGRRHAD  | EELGRRHAD  | ELGRRHAD  |
| 142 | VEELGRRHADG  | EELGRRHADG  | ELGRRHADG  | LGRRHADG  |
| 143 | EELGRRHADGS  | ELGRRHADGS  | LGRRHADGS  | GRRHADGS  |
| 144 | ELGRRHADGSF  | LGRRHADGSF  | GRRHADGSF  | RRHADGSF  |
| 145 | LGRRHADGSFS  | GRRHADGSFS  | RRHADGSFS  | RHADGSFS  |
| 146 | GRRHADGSFSD  | RRHADGSFSD  | RHADGSFSD  | HADGSFSD  |
| 147 | RRHADGSFSDE  | RHADGSFSDE  | HADGSFSDE  | ADGSFSDE  |
| 148 | RHADGSFSDEM  | HADGSFSDEM  | ADGSFSDEM  | DGSFSDEM  |
| 149 | HADGSFSDEMNT | ADGSFSDEMNT | DGSFSDEMNT | GSFSDEMNT |
| 150 | ADGSFSDEMNT  | DGSFSDEMNT  | GSFSDEMNT  | SFSDEMNT  |
| 151 | DGSFSDEMNTI  | GSFSDEMNTI  | SFSDEMNTI  | FSDEMNTI  |
| 152 | GSFSDEMNTIL  | SFSDEMNTIL  | FSDEMNTIL  | SDEMNTIL  |
| 153 | SFSDEMNTILD  | FSDEMNTILD  | SDEMNTILD  | DEMNTILD  |
| 154 | FSDEMNTILDN  | SDEMNTILDN  | DEMNTILDN  | EMNTILDN  |
| 155 | SDEMNTILDNL  | DEMNTILDNL  | EMNTILDNL  | MNTILDNL  |
| 156 | DEMNTILDNLA  | EMNTILDNLA  | MNTILDNLA  | NTILDNLA  |
| 157 | EMNTILDNLAA  | MNTILDNLAA  | NTILDNLAA  | TILDNLAA  |
| 158 | MNTILDNLAAR  | NTILDNLAAR  | TILDNLAAR  | ILDNLAAR  |
| 159 | NTILDNLAARD  | TILDNLAARD  | ILDNLAARD  | LDNLAARD  |
| 160 | TILDNLAARDF  | ILDNLAARDF  | LDNLAARDF  | DNLAARDF  |
| 161 | ILDNLAARDFI  | LDNLAARDFI  | DNLAARDFI  | NLAARDFI  |
| 162 | LDNLAARDFIN  | DNLAARDFIN  | NLAARDFIN  | LAARDFIN  |
| 163 | DNLAARDFINW  | NLAARDFINW  | LAARDFINW  | AARDFINW  |
| 164 | NLAARDFINWL  | LAARDFINWL  | AARDFINWL  | ARDFINWL  |
| 165 | LAARDFINWLI  | AARDFINWLI  | ARDFINWLI  | RDFINWLI  |
| 166 | AARDFINWLIQ  | ARDFINWLIQ  | RDFINWLIQ  | DFINWLIQ  |
| 167 | ARDFINWLIQT  | RDFINWLIQT  | DFINWLIQT  | FINWLIQT  |
| 168 | RDFINWLIQTK  | DFINWLIQTK  | FINWLIQTK  | INWLIQTK  |
| 169 | DFINWLIQTKI  | FINWLIQTKI  | INWLIQTKI  | NWLIQTKI  |
| 170 | FINWLIQTKIT  | INWLIQTKIT  | NWLIQTKIT  | WLIQTKIT  |
| 171 | INWLIQTKITD  | NWLIQTKITD  | WLIQTKITD  | LIQTKITD  |
| 172 | NWLIQTKITDR  | WLIQTKITDR  | LIQTKITDR  | IQTKITDR  |
| 173 | WLIQTKITDRK  | LIQTKITDRK  | IQTKITDRK  | QTKITDRK  |



## Supplementary Table 6b: Preproinsulin and insulin DRiP peptide sequences

| Peptide Name | Sequence    | Peptide Name | Sequence    |
|--------------|-------------|--------------|-------------|
| PPI:1-9      | MALWMRLLP   | PPI:34-41    | HLVEALYL    |
| PPI:1-10     | MALWMRLLPL  | PPI:40-50    | YLVCGERGFFY |
| PPI:2-10     | ALWMRLLPL   | PPI:41-50    | LVCGERGFFY  |
| PPI:3-10     | LWMRLLPL    | PPI:42-50    | VCGERGFFY   |
| PPI:1-11     | MALWMRLLPLL | PPI:43-50    | CGERGFFY    |
| PPI:2-11     | ALWMRLLPLL  | PPI:43-53    | CGERGFFYTPK |
| PPI:3-11     | LWMRLLPLL   | PPI:44-53    | GERGFFYTPK  |
| PPI:4-11     | WMRLLPLL    | PPI:45-53    | ERGFFYTPK   |
| PPI:2-12     | ALWMRLLPLLA | PPI:46-53    | RGFFYTPK    |
| PPI:3-12     | LWMRLLPLLA  | PPI:44-54    | GERGFFYTPKT |
| PPI:4-12     | WMRLLPLLA   | PPI:45-54    | ERGFFYTPKT  |
| PPI:5-12     | MRLLPLLA    | PPI:46-54    | RGFFYTPKT   |
| PPI:3-13     | LWMRLLPLLAL | PPI:47-54    | GFFYTPKT    |
| PPI:4-13     | WMRLLPLLAL  | PPI:67-77    | ELGGPGAGSL  |
| PPI:5-13     | MRLLPLLAL   | PPI:68-77    | LGGPGAGSL   |
| PPI:6-13     | RLLPLLAL    | PPI:69-77    | GGGPGAGSL   |
| PPI:13-23    | LLALWGPDPA  | PPI:70-77    | GGPGAGSL    |
| PPI:14-23    | LALWGPDPA   | PPI:69-79    | GGGPGAGSLQP |
| PPI:15-23    | ALWGPDPA    | PPI:70-79    | GGPGAGSLQP  |
| PPI:16-23    | LWGPDPA     | PPI:71-79    | GPGAGSLQP   |
| PPI:14-24    | LALWGPDPA   | PPI:72-79    | PGAGSLQP    |
| PPI:15-24    | ALWGPDPA    | PPI:89-99    | RGIVEQCCTSI |
| PPI:16-24    | LWGPDPA     | PPI:90-99    | GIVEQCCTSI  |
| PPI:17-24    | WGPDPA      | PPI:91-99    | IVEQCCTSI   |
| PPI:15-25    | ALWGPDPA    | PPI:92-99    | VEQCCTSI    |
| PPI:16-25    | LWGPDPA     | PPI:90-100   | GIVEQCCTSI  |
| PPI:17-25    | WGPDPA      | PPI:91-100   | IVEQCCTSI   |
| PPI:18-25    | GPDPAA      | PPI:92-100   | VEQCCTSI    |
| PPI:21-31    | PAAAFVNQHLC | PPI:93-100   | EQCCTSI     |
| PPI:22-31    | AAAFVNQHLC  | PPI:92-102   | VEQCCTSI    |
| PPI:23-31    | AAFVNQHLC   | PPI:93-102   | EQCCTSI     |
| PPI:24-31    | AFVNQHLC    | PPI:94-102   | QCCTSI      |
| PPI:22-32    | AAAFVNQHLCG | PPI:95-102   | CCTSI       |
| PPI:23-32    | AAFVNQHLCG  | PPI:93-103   | EQCCTSI     |
| PPI:24-32    | AFVNQHLCG   | PPI:94-103   | QCCTSI      |
| PPI:25-32    | FVNQHLCG    | PPI:95-103   | CCTSI       |
| PPI:30-40    | LCGSHLVEALY | PPI:96-103   | CTSI        |
| PPI:31-40    | CGSHLVEALY  | DRiP:1-9     | MLYQHLLPL   |
| PPI:32-40    | GSHLVEALY   | DRiP:2-9     | LYQHLLPL    |
| PPI:33-40    | SHLVEALY    | DRiP:5-15    | HLLPLPAGELL |
| PPI:31-41    | CGSHLVEALYL | DRiP:6-15    | LLPLPAGELL  |
| PPI:32-41    | GSHLVEALYL  | DRiP:7-15    | LPLPAGELL   |
| PPI:33-41    | SHLVEALYL   | DRiP:8-15    | PLPAGELL    |

## Supplementary Methods and Materials

### *T-cell isolation and TCR sequencing*

Isolation of T-cells from islet tissues were performed using a protocol as described previously (1). Briefly, islet tissues were cultured in RPMI supplemented with Penicillin-Streptomycin, human AB+ serum, interleukin-2, interleukin-15, interleukin-7 for one-four days except those from T1D-1, which were cultured for approximately 10 days. The islet tissues were dispersed to single cells by treating with Liberase DL, followed by staining with anti-CD3, anti-CD4, and anti-CD8 antibodies along with 4'6-diamidino-2-phenylindole. CD3 $\epsilon$ +CD4+ and CD3 $\epsilon$ +CD8+ cells were identified and sorted into an each well of 96-well plates using the MoFlo Astrios EQ flow cytometric sorter. Single cells were then lysed for reverse-transcriptase reaction using mixture of random hexamers and primers specific for the constant regions of T-cell-receptor alpha and beta chains. TCR alpha and beta chain genes were amplified by the multiplex polymerase chain reaction (PCR) using primers targeting individual variable region genes and the constant region-specific primer. Individual PCR products were further amplified using primers conjugated with the Illumina adaptor oligonucleotides and index sequences for high-throughput sequencing on Illumina MiSeq. Sequences were demultiplexed and analyzed by the IMGT-HighV-QUEST algorithm to identify variable gene, joining gene, and junction sequences for individual cells. Primer sequence information was published previously (1).

### *Generation of TCR and HLA transductants*

Transductants expressing TCR or HLA molecules were generated using a recently published protocol (2, 3). Briefly, TCR alpha and beta gene fragments, in which human variable regions are followed by the murine constant regions, were connected by the porcine teschovirus-1 2A (P2A) peptide and inserted into a murine stem cell virus-based retroviral vector, and introduced into 5KC T-hybridoma reporter cells using a standard retroviral expression protocol. The 5KC reporter cells were engineered with a nuclear factor activated T-cells (NFAT)-driven fluorescent reporter, ZsGreen-1, along with the human CD8 gene and fluorescent protein genes as identifiers, and thus express ZsGreen-1 upon activation, and cells expressing individual TCRs can be distinguished by fluorescent protein identifiers. To generate HLA transductants, individual HLA class I genes connected to the human beta-2 microglobulin with the P2A peptide in between were engineered into a human immunodeficiency virus 1 (HIV-1)-based lentiviral vector with a spleen focus-forming virus (SFFV) promoter, and transduced into human myeloma-derived K562 cells using a standard spinfection protocol.

### *Screening for reactivity to preproinsulin, insulin DRiP, glucagon, and other islet antigen peptides*

We used a multiplex T-cell stimulation assay system to test reactions to peptides and truncated peptide pools using a recently published protocol (2, 3). In this system, up to eight TCR transductants expressing different combinations of fluorescent protein identifiers were mixed and cultured in the presence or absence of antigens in each well of 96-well plates, and demultiplexed to assess ZsGreen-1 reporter protein expressions by each TCR transductant. For screening of reactivity to preproinsulin, insulin DRiP, and glucagon, peptide pools, each of which contains 8- to 11-mers of crude peptides ending at a same position of preproinsulin, insulin DRiP, and glucagon, were custom-ordered from Mimotopes (Mulgrave, Australia) and added at approximately 200  $\mu$ g/ml. Amino acid sequences contained in each peptide pool are shown in [Supplementary Tables 2, 3, and 5](#). To assess responses to known islet antigen-derived epitopes ([Supplementary Table 4](#)), each peptide was added at

100  $\mu$ M. We used autologous EBV-transformed B cells, generated using spleen cells of individual donors that were co-cultured with EBV-containing supernatants produced from B95-9 cells, as antigen-presenting cells to stimulate TCR transductants derived from organ donors having T1D (100,000 cells per well). For screening of TCRs derived from non-diabetic organ donors, we used mixtures of transductants expressing individual HLA-A, B, and C alleles (50,000 cells per well). Mixtures of TCR transductants (20,000 cells per well for each TCR transductant) were cultured with or without peptides in the presence of antigen-presenting cells for overnight, followed by evaluating ZsGreen-1 expression on a Cytoflex flow cytometer (Beckman Coulter). Cultures with 5  $\mu$ g/ml of anti-mouse CD3 $\epsilon$  antibody (Clone 125-2C11, BD) were included in the assay as positive control.

#### *Confirming positive responses and determining HLA restriction*

Peptides contained in truncated peptide pools that stimulated TCR transductants were synthesized by Genemed Synthesis (San Antonio, Texas). Individual TCR transductant cells (20,000 cells per well) were cultured with or without each peptide (100  $\mu$ M) in the presence of HLA transductant cells transduced with each HLA class I allele of the donor (50,000 cells per well) for overnight, followed by evaluating ZsGreen-1 expression on a Cytoflex flow cytometer (Beckman Coulter). Peptides and HLA class I alleles tested for each TCR clonotype are shown in [Supplementary Tables 6a and 6b](#). Cultures with 5  $\mu$ g/ml of anti-mouse CD3 $\epsilon$  antibody (Clone 125-2C11, BD) were included in the assay as positive control.

#### *Determining potency of responses to optimal epitopes*

TCR transductant cells (20,000 cells per well) were cultured with peptides at concentrations ranging from 10 pM to 100  $\mu$ M in the presence of HLA transductant cells expressing a cognate HLA class I molecule (50,000 cells per well) for overnight, followed by evaluating ZsGreen-1 expression on a Cytoflex flow cytometer (Beckman Coulter). Peptide sequences are shown in [Supplementary Table 6b](#). EC<sub>50</sub> values were calculated using GraphPad Prism 8, the nonlinear regression log (agonist) vs. response (three parameters) equation model. For TCR clonotypes, 28.D3, 96.F5, 28.E6, and 131.D5, EC<sub>50</sub> values were not determined due to weak responses, and therefore the nonlinear regression log (agonist) vs. normalized response equation model was used to determine EC<sub>50</sub> values.

#### *Cytokine ELISPOT assays*

Assays were conducted as previously described using the human IFN- $\gamma$  ELISPOT kits (UCyTech Biosciences) (4). Briefly, cryopreserved PBMCs were thawed and 10<sup>6</sup> cells cultured in 250  $\mu$ l of serum free AIM-V<sup>®</sup> Medium (Invitrogen) in a 48-well polystyrene culture plate with 20  $\mu$ g/ml of preproinsulin truncated peptide pools dissolved in dimethyl sulfoxide (DMSO) at 37°C with 5% CO<sub>2</sub>. Cells were harvested after 48 hours, washed, then resuspended in 300  $\mu$ l medium and transferred as three 100  $\mu$ l aliquots to 96-well clear polystyrene culture plates coated with an IFN- $\gamma$  capture monoclonal antibody. Seventeen hours later, the cells were removed by decanting and the wells washed. Spots were then developed by sequential incubations with the biotinylated 2<sup>nd</sup> site anti-IFN- $\gamma$ , gold-labeled goat anti-biotin, and a precipitating silver substrate. Spots were enumerated with a Bioreader 4000 Pro X (BIOSYS GmbH). For each assay, negative control wells had no antigen but received the same final concentration of DMSO as the PPI wells, and the Pediarix vaccine (GlaxoSmithKline), a childhood vaccine containing five different immunogens, was used as a positive control.

The viral mix contained known CD8 T-cell epitopes from Epstein-Barr virus (CLGGLLTMV), cytomegalovirus (NLVPMVATV), and measles (SMYRVFEVGV) at a final concentration of 20 µg/ml.

1. A. W. Michels *et al.*, Islet-Derived CD4 T Cells Targeting Proinsulin in Human Autoimmune Diabetes. *Diabetes* **66**, 722-734 (2017).
2. S. E. Mann *et al.*, Multiplex T Cell Stimulation Assay Utilizing a T Cell Activation Reporter-Based Detection System. *Frontiers in immunology* **11**, 633 (2020).
3. L. G. Landry, S. E. Mann, A. M. Anderson, M. Nakayama, Multiplex T-cell Stimulation Assay Utilizing a T-cell Activation Reporter-based Detection System. *Bio-Protocol* **11**, e3883 (2021).
4. M. Nagata *et al.*, Detection of autoreactive T cells in type 1 diabetes using coded autoantigens and an immunoglobulin-free cytokine ELISPOT assay: report from the fourth immunology of diabetes society T cell workshop. *Annals of the New York Academy of Sciences* **1037**, 10-15 (2004).
